# Supplementary material for: Private traits and attributes are predictable from digital records of human behavior
Source: HighWire-hosted journal article supplement (doi:10.1073/pnas.1218772110), 2013-03-11
Supplement: st01.pdf [file st01.pdf]

| Trait                                               | Selected most predictive Likes                                                                                                                                                     |                                                                                                                                                             |                           |
|-----------------------------------------------------|------------------------------------------------------------------------------------------------------------------------------------------------------------------------------------|-------------------------------------------------------------------------------------------------------------------------------------------------------------|---------------------------|
| <b>IQ</b><br><i>High</i>                            | The Godfather<br>Mozart<br>Thunderstorms<br>The Colbert Report<br>Morgan Freemans Voice<br>The Daily Show<br>Lord Of The Rings<br>To Kill A Mockingbird<br>Science<br>Curly Fries  | Jason Aldean<br>Tyler Perry<br>Sephora<br>Chiq<br>Bret Michaels<br>Clark Griswold<br>Bebe<br>I Love Being A Mom<br>Harley Davidson<br>Lady Antebellum       | <i>Low</i>                |
| <b>Satisfaction With Life</b><br><i>Satisfied</i>   | Sarah Palin<br>Glenn Beck<br>Proud To Be Christian<br>Indiana Jones<br>Swimming<br>Jesus Christ<br>Bible<br>Jesus<br>Being Conservative<br>Pride And Prejudice                     | Hawthorne Heights<br>Kickass<br>Atreyu (Metal Band)<br>Lamb Of God<br>Gorillaz<br>Science<br>Quote Portal<br>Stewie Griffin<br>Killswitch Engage<br>Ipod    | <i>Dissatisfied</i>       |
| <b>Openness</b><br><i>Liberal &amp; Artistic</i>    | Oscar Wilde<br>Charles Bukowski<br>Sylvia Plath<br>Leonardo Da Vinci<br>Bauhaus<br>Dmt The Spirit Molecule<br>American Gods<br>John Waters<br>Plato<br>Leonard Cohen               | NASCAR<br>Austin Collie<br>Monster-In-Law<br>I don't read<br>Justin Moore<br>ESPN2<br>Farmlandia<br>The Bachelor<br>Oklahoma State University<br>Teen Mom 2 | <i>Conservative</i>       |
| <b>Conscientiousness</b><br><i>Well Organized</i>   | Law Officer<br>National Law Enforcement Lowfares.Com<br>Accounting<br>Foursquare<br>Emergency Medical Services<br>Sunday Best<br>Kaplan University<br>Glock Inc<br>Mycalendar 2010 | Wes Anderson<br>Bandit Nation<br>Omegle<br>Vocaloid<br>Serial Killer<br>Screamo<br>Anime<br>Vamplets<br>Join If Ur Fat<br>Not Dying                         | <i>Spontaneous</i>        |
| <b>Extraversion</b><br><i>Outgoing &amp; Active</i> | Beerpong<br>Michael Jordan<br>Dancing<br>Socializing<br>Chris Tucker<br>I Feel Better Tan<br>Modeling<br>Cheerleading<br>Theatre<br>Flip Cup                                       | RPGs<br>Fanfiction.Net<br>Programming<br>Anime<br>Manga<br>Video Games<br>Role Playing Games<br>Minecraft<br>Voltaire<br>Terry Pratchet                     | <i>Shy &amp; Reserved</i> |

|                            |                    |                                                                                                                                                                                                                      |                                                                                                                                                                                                         |                           |
|----------------------------|--------------------|----------------------------------------------------------------------------------------------------------------------------------------------------------------------------------------------------------------------|---------------------------------------------------------------------------------------------------------------------------------------------------------------------------------------------------------|---------------------------|
| <b>Agreeableness</b>       | <b>Cooperative</b> | Compassion International<br>Logan Utah<br>Jon Foreman<br>Redeeming Love<br>Pornography Harms<br>The Book Of Mormon<br>Circles Of Prayer<br>Go To Church<br>Christianity<br>Marianne Williamson                       | I Hate Everyone<br>I Hate You<br>I Hate Police<br>Friedrich Nietzsche<br>Timmy South Park<br>Atheism / Satanism<br>Prada<br>Sun Tzu<br>Julius Caesar<br>Knives                                          | <b>Competitive</b>        |
| <b>Emotional Stability</b> | <b>Neurotic</b>    | Sometimes I Hate Myself<br>Emo<br>Girl Interrupted<br>So So Happy<br>The Addams Family<br>Vocaloid<br>Sixbillionsecrets.com<br>Vampires Everywhere<br>Kurt Donald Cobain<br>Dot Dot Curve                            | Business Administration<br>Getting Money<br>Parkour<br>Track & Field<br>Skydiving<br>Mountain Biking<br>Soccer<br>Climbing<br>Physics / Engineering<br>48 Laws Of Power                                 | <b>Calm &amp; Relaxed</b> |
| <b>Gender</b>              | <b>Female</b>      | Tv Fanatic<br>Chiq<br>Gillette Venus<br>Shoedazzle<br>Bebe<br>Proud To Be A Mom<br>Covergirl<br>Wet Seal<br>Aerie By American Eagle<br>Mall World                                                                    | Modern Warfare 2<br>ESPN<br>Sportscenter<br>Band Of Brothers<br>Starcraft<br>Deadliest Warrior<br>Dos Equis<br>Red Vs Blue<br>X Games<br>Bruce Lee                                                      | <b>Male</b>               |
| <b>Age</b>                 | <b>Old</b>         | Cup Of Joe For A Joe<br>Coffee Party Movement<br>Dr Mehmet Oz<br>Fixit And Forgetit<br>The Closer<br>Joyce Meyer Ministries<br>Proud To Be A Mom<br>Freedomworks<br>Small Business Saturday<br>Fly The American Flag | Walt Disney Records<br>Body By Milk<br>Harperteen<br>J Bigga<br>Because I Am A Girl<br>I Hate My Id Photo<br>293 Things To Do In Class When You<br>Are Bored<br>Dude Wait What<br>JCP Teen              | <b>Young</b>              |
| <b>Friends</b>             | <b>Many</b>        | Mojo-Jojo<br>Biology<br>Dollar General<br>Hillary<br>106 & Park<br>Jennifer Lopez<br>Paid In Full<br>Yo Gotti<br>The Dollar You Are Holding Could've<br>Been In A Stripper's Butt Crack                              | The Dark Knight<br>In'n'out Burger<br>Hard Rock<br>Honey, Where Is My Supersuit<br>Hating ICP<br>Minecraft<br>Iron Maiden<br>Walking With Your Friend & Randomly<br>Pushing Them Into Someone/Something | <b>Few</b>                |

|                                                                   |                                                                                                                                                                                                                                                                                                                                              |                                                                                                                                                                                                                                                                                                                                                  |                                    |
|-------------------------------------------------------------------|----------------------------------------------------------------------------------------------------------------------------------------------------------------------------------------------------------------------------------------------------------------------------------------------------------------------------------------------|--------------------------------------------------------------------------------------------------------------------------------------------------------------------------------------------------------------------------------------------------------------------------------------------------------------------------------------------------|------------------------------------|
| <p><b>Religion</b></p> <p><i>Christian</i></p>                    | <p>The Bible<br/>         Jesus Daily<br/>         I'm Proud To Be Christian<br/>         God<br/>         Jesus Christ<br/>         Church<br/>         The Holy Bible<br/>         I Love Jesus<br/>         Christian Music<br/>         Gospel Music</p>                                                                                 | <p>I'm A Muslim &amp; I'm Proud<br/>         Hadith Of The Day<br/>         I Love Islam<br/>         I Need Allah In My Life<br/>         Prophet Muhammad Saw The Greatest Man In History<br/>         Remove Group Fuck Islam From Facebook<br/>         Nancy Ajram<br/>         Moozlum The Movie<br/>         Desihits.Com</p>             | <p><i>Muslim</i></p>               |
| <p><b>Politics</b></p> <p><i>Republican</i></p>                   | <p>George W Bush<br/>         John McCain<br/>         Conservative<br/>         Rush Limbaugh<br/>         Sean Hannity<br/>         Bill Oreilly<br/>         Positively Republican<br/>         Sarah Palin<br/>         Ronald Reagan<br/>         Glenn Beck</p>                                                                        | <p>Joe Biden<br/>         Speaker Nancy Pelosi<br/>         Health Care Reform<br/>         The White House<br/>         Democrats<br/>         Barbara Boxer<br/>         Anthony Weiner<br/>         Being Liberal<br/>         Left Action<br/>         Barack Obama2012<br/>         Ted Kennedy</p>                                         | <p><i>Democrat</i></p>             |
| <p><b>Sexual Orientation</b></p> <p><i>Homosexual Males</i></p>   | <p>No H8 Campaign<br/>         Kathy Griffin<br/>         Kurt Hummel Glee<br/>         Human Rights Campaign<br/>         Mac Cosmetics<br/>         Adam Lambert<br/>         Ellen DeGeneres<br/>         Juicy Couture<br/>         Sue Sylvester Glee<br/>         Wicked The Musical</p>                                               | <p>X Games<br/>         Nike Basketball<br/>         Bungie<br/>         WWE<br/>         Sportsnation<br/>         Wu-Tang Clan<br/>         Foot Locker<br/>         Shaq<br/>         Bruce Lee<br/>         Being Confused After Waking Up From Naps</p>                                                                                     | <p><i>Heterosexual Males</i></p>   |
| <p><b>Sexual Orientation</b></p> <p><i>Homosexual Females</i></p> | <p>Girls Who Like Boys Who Like Boys<br/>         Rupauls Drag Race<br/>         No H8 Campaign<br/>         Gay Marriage<br/>         Human Rights Campaign<br/>         The L Word<br/>         Sometimes I Just Lay In Bed And Think About Life<br/>         Not Being Pregnant<br/>         Gay Marriage<br/>         Tegan And Sara</p> | <p>Lipton Brisk<br/>         Yahoo<br/>         Adidas Originals<br/>         Foot Locker<br/>         WWE<br/>         Inbox 1 Makes Me Nervous<br/>         Thinking Of Something And Laughing Alone<br/>         I Just Realized Immature Spells I'm Mature<br/>         Did You Get A Haircut No It Grew Shorter<br/>         Nike Women</p> | <p><i>Heterosexual Females</i></p> |

|                                                            |                                                                                                                                                                                                                                                                                                                                                                                                                                       |                                                                                                                                                                                                                                                                                                                                                                                                                                                                                                                                                                                                                                                 |                              |
|------------------------------------------------------------|---------------------------------------------------------------------------------------------------------------------------------------------------------------------------------------------------------------------------------------------------------------------------------------------------------------------------------------------------------------------------------------------------------------------------------------|-------------------------------------------------------------------------------------------------------------------------------------------------------------------------------------------------------------------------------------------------------------------------------------------------------------------------------------------------------------------------------------------------------------------------------------------------------------------------------------------------------------------------------------------------------------------------------------------------------------------------------------------------|------------------------------|
| <p><b>Race</b></p> <p><i>African-American</i></p>          | <p>I Support My President<br/> Fantasia<br/> Jill Scott<br/> Next Friday<br/> Erykah Badu<br/> Maxwell<br/> Taraji P Henson<br/> Madea<br/> Tyga<br/> Love And Basketball</p>                                                                                                                                                                                                                                                         | <p>Just Because You Can Reproduce Doesn't Mean You Should<br/> I Come From A Town Where A Traffic Jam Is 4 Cars Behind A Tractor<br/> Harley Davidson<br/> Halloween<br/> Bret Michaels<br/> David Bowie Official<br/> ASPCA<br/> Fly The American Flag<br/> Road Trips<br/> Bonfires</p>                                                                                                                                                                                                                                                                                                                                                       | <p><i>White American</i></p> |
| <p><b>Relationship</b></p> <p><i>In a Relationship</i></p> | <p>I Love My Husband<br/> Kids<br/> Circle Of Moms<br/> Parents Magazine<br/> Tacori<br/> Weight Watchers<br/> Scrapbooking<br/> Huggies<br/> Box Tops For Education<br/> Babies R Us</p>                                                                                                                                                                                                                                             | <p>J.Cole<br/> Hunger Games<br/> Ign.com<br/> Kassem G<br/> Sonny With A Chance<br/> Usain Bolt<br/> 2ne1<br/> Mangastream<br/> Sportsnation<br/> Maria Sharapova</p>                                                                                                                                                                                                                                                                                                                                                                                                                                                                           | <p><i>Single</i></p>         |
| <p><b>Alcohol Use</b></p> <p><i>Yes</i></p>                | <p>Watching Karma Bite The Person You Hate Right In The Ass<br/> Dear Liver Thanks You're A Champ<br/> Trying To Figure Out If Its A Cop Car<br/> Belvedere Vodka<br/> Meeting Someone Who Is Also Drunk And Immediately Becoming Best Friends<br/> Jim Beam<br/> I Love It When In The Middle Of Our Kiss<br/> I Can Feel You Smiling<br/> Tattoo Lovers<br/> Getting A Text That Says I Miss You<br/> Drinking Around A Bonfire</p> | <p>Bungie<br/> I Hate Going Back To School After The Holidays<br/> When I'm Home Alone And I Hear A Noise I Freeze And Listen For Ages<br/> Not Finishing A Sentence Because Your Laughing Too Hard About The Ending<br/> Why Is Monday So Far Away From Friday And Friday So Bloody Close To Monday<br/> I Hate When I Originally Pick The Right Answer Then Change It<br/> That's Going In My Status When I Get Home<br/> I Don't Care There Is 30 Seconds Left In This Class I'm Packing Up<br/> Pretending To Think When The Teacher Is Looking At You<br/> I Like Watching Raindrops Race Across My Window And Silently Cheer For Them</p> | <p><i>No</i></p>             |

|                                                                   |                                                                                                                                                                                                                                                                                                                                                                                                                                                                                                                                                                                                                                                                                                                                                                                                                                                                                                                                                                                                                                                                              |                                                                                                                                                                                                                                                                                                                                                                                                                                                                                                                       |                                              |
|-------------------------------------------------------------------|------------------------------------------------------------------------------------------------------------------------------------------------------------------------------------------------------------------------------------------------------------------------------------------------------------------------------------------------------------------------------------------------------------------------------------------------------------------------------------------------------------------------------------------------------------------------------------------------------------------------------------------------------------------------------------------------------------------------------------------------------------------------------------------------------------------------------------------------------------------------------------------------------------------------------------------------------------------------------------------------------------------------------------------------------------------------------|-----------------------------------------------------------------------------------------------------------------------------------------------------------------------------------------------------------------------------------------------------------------------------------------------------------------------------------------------------------------------------------------------------------------------------------------------------------------------------------------------------------------------|----------------------------------------------|
| <p style="text-align: center;"><b>Parents separated at 21</b></p> | <p style="text-align: center;"><i>Yes</i></p> <p>When Ur Single, All U See Is Happy<br/> Couples N Wen Ur In A Relationship All U See Is Happy Singles<br/> Never Apologize For What You Feel It's Like Saying Sorry For Being Real<br/> I'm The Type Of Girl Who Can Be So Hurt But Still Look At You &amp; Smile The Type Of Girl Who Is Willing To Brighten Your Day Even If I Can't Brighten My Own &lt;3 &lt;3<br/> We Don't Talk Anymore And You Know What The Saddest Part Is We Used To Talk Everyday<br/> Come Here Nope [Grab Yu Closer] Gimme A Kiss Nope I'm Mad At Yu [Start Kissing]<br/> Tell Her She's Pretty Hold Her Hand Kiss Her When She's Angry Play With Her Hair Let Her Fall Asleep In Your Arms Kiss Her In The Rain Tell Her You Love Her But Waitheres The Catchyou Actually Have To Mean It<br/> You Need Anger Management Classes You Need Shut The Fukk Up Classes<br/> If I'm With You Then I'm With You I Don't Want Anybody Else<br/> Bitch You Ain't Pretty Your A Slut That's Why All The Guys Talk To You<br/> I'm Sorry I Love You</p> | <p>Apples To Apples The Helen Keller Card<br/> Deliberately Driving Slower When Being Tailgated<br/> Watching Peoples Lives Fall Apart Via Status Updates And News Feeds<br/> Every Time I See You A Voice In My Head Goes Dooouuuuccccheee<br/> Making Dirty Innuendos Out Of Perfectly Innocent Things<br/> Gene Wilder<br/> I Hate It When You're With Mc Hammer And He Doesn't Let You Touch Anything<br/> I Immediately Look In My Rear-view Mirror When I Pass A Cop<br/> The Joy Of Painting With Bob Ross</p> | <p style="text-align: center;"><i>No</i></p> |
| <p style="text-align: center;"><b>Drugs Use</b></p>               | <p style="text-align: center;"><i>Yes</i></p> <p>Causes.com<br/> Big Mommas Movies<br/> No You Ask<br/> I Like Lyrics That Actually Mean Something<br/> Austin Texas<br/> That Awkward Moment When You Get In The Van And There's No Candy<br/> Texting With Cold Hands Is Like Typing In Slow Motion<br/> Dragging Your Blanket Around The House With You Because You're Cold<br/> Relationships Should Be Between Two People Not The Whole Universe<br/> Pushing Your Friends Into Random People In The Hallway</p>                                                                                                                                                                                                                                                                                                                                                                                                                                                                                                                                                        | <p>Swimming<br/> Inside Jokes<br/> So What Animal Is Your Bracelet<br/> Awkwardly Trying To Run With A Backpack<br/> Pau Gasol<br/> Chocolate Chip Cookie Dough Ice Cream Milkshakes<br/> Sour Candy<br/> Sliding On Floors With Your Socks On<br/> Wouldn't It Be Ironic If You Choked On A Life Saver</p>                                                                                                                                                                                                           | <p style="text-align: center;"><i>No</i></p> |

|                |            |                                                                                                                                                                                                                                                                                          |                                                                                                                                                                                                                                                                                                                                                                                                                                                                                                                               |           |
|----------------|------------|------------------------------------------------------------------------------------------------------------------------------------------------------------------------------------------------------------------------------------------------------------------------------------------|-------------------------------------------------------------------------------------------------------------------------------------------------------------------------------------------------------------------------------------------------------------------------------------------------------------------------------------------------------------------------------------------------------------------------------------------------------------------------------------------------------------------------------|-----------|
| <b>Smoking</b> | <i>Yes</i> | Cradle Of Filth<br>Under Armour<br>Slayer Band<br>Inbox 1 Makes Me Nervous<br>Dimebag Darrell<br>Rob Zombie<br>I Always Accept The Terms And<br>Conditions Without Reading Them<br>I Bottle Everything Up Until I Finally Snap<br>Life Is Better In Summer<br>Screwing Around In Walmart | That Spider Is More Scared Than U Are<br>Oh Really Did It Tell U That<br>Honda<br>Move Out Of The Way Children I've<br>Been Waiting 11 Years To See Toy<br>Story 3<br>FBI Open The Door No Its Cool When<br>You Break In<br>How To Make A Girl Smile <3<3<br>The Desk Able To Protect You From Fire<br>Earthquakes And Nuclear War<br>When Your Fortune Cookie Knows<br>What's Up<br>Rocky<br>When Little Kids Are Chasing Me I Run<br>Slow So They Think They're Fast<br>I Drop My I-pod Then My Headphones<br>Save Its Life | <i>No</i> |
|                |            |                                                                                                                                                                                                                                                                                          |                                                                                                                                                                                                                                                                                                                                                                                                                                                                                                                               |           |

Table S-1. Likes characterized by the most extreme average levels for each of the numeric variables (e.g. personality traits) or most extreme frequencies of classes (e.g. being a Democrat). We used only Likes that were associated with more than 100 users.
